# Supplementary material for: Projections of suitable habitat loss and its implications in conservation for endemic non-pseudantial Euphorbioideae (Euphorbiaceae) species in Northeastern Brazil under climate change scenarios
Source: Research Square preprint supplement (doi:10.21203/rs.3.rs-7781649/v1), 2025-12-04
Supplement: Supplementary file 1 [file 6da45109e68ea233e263a634.docx]

**Supplementary data**

**Table 1**. Minimum and maximum elevation of the sampled species endemic to Northeastern Brazil

| **Species** | **Minimum elevation (m)** | **Maximum elevation (m)** |
| --- | --- | --- |
| Ac_appendiculatus | 12 | 350 |
| Al_bahiensis | 13 | 225 |
| Gr_franciscana | 119 | 120 |
| Ma_f_bahiensis | 372 | 770 |
| Mi_heterodoxa | 4 | 1206 |
| Mi_revoluta | 888 | 1269 |
| Mi_uleana | 777 | 1531 |
| Op_parviflorum | 360 | 360 |
| Op_pedunculare | 16 | 474 |
| Se_jacobinensis | 50 | 860 |
| Se_macrocarpa | 18 | 853 |
| Se_trinervia | 607 | 607 |
| Sa_sceleratum | 153 | 887 |
| St_loranthacea | 839 | 1074 |
| St_trapezoidea | 170 | 1129 |

**Table 2**. Extent of Occurrence (EOO) and Area of ​​Occupancy (AOO) based on the current distribution of endemic species of Northeastern Brazil

| **Species** | **EOO (km²)** | **AOO (km²)** |
| --- | --- | --- |
| Ac_appendiculatus | 169,959.304 | 114 |
| Al_bahiensis | 8,230.618 | 28 |
| Gr_franciscana | 00 | 6 |
| Ma_f_bahiensis | 35,387.887 | 28 |
| Mi_heterodoxa | 226,.694.344 | 356 |
| Mi_revoluta | 146.963 | 24 |
| Mi_uleana | 31,357.204 | 132 |
| Op_parviflorum | 0 | 4 |
| Op_pedunculare | 4,363.019 | 24 |
| Se_jacobinensis | 328,437.8540 | 116 |
| Se_macrocarpa | 442,805.7598 | 336 |
| Se_trinervia | 0 | 4 |
| Sa_sceleratum | 212,176.014 | 32 |
| St_loranthacea | 634.365 | 52 |
| St_trapezoidea | 599,044.629 | 232 |
